# Supplementary material for: Exome Sequencing of Uterine Leiomyosarcomas Identifies Frequent Mutations in TP53, ATRX, and MED12
Source: PubMed Central journal article supplement (PMC4758603; doi:10.1371/journal.pgen.1005850), 2016-02-18

**Supplementary Figure S1.** The types and positions of the observed *TP53*, *ATRX*, and *MED12* mutations.

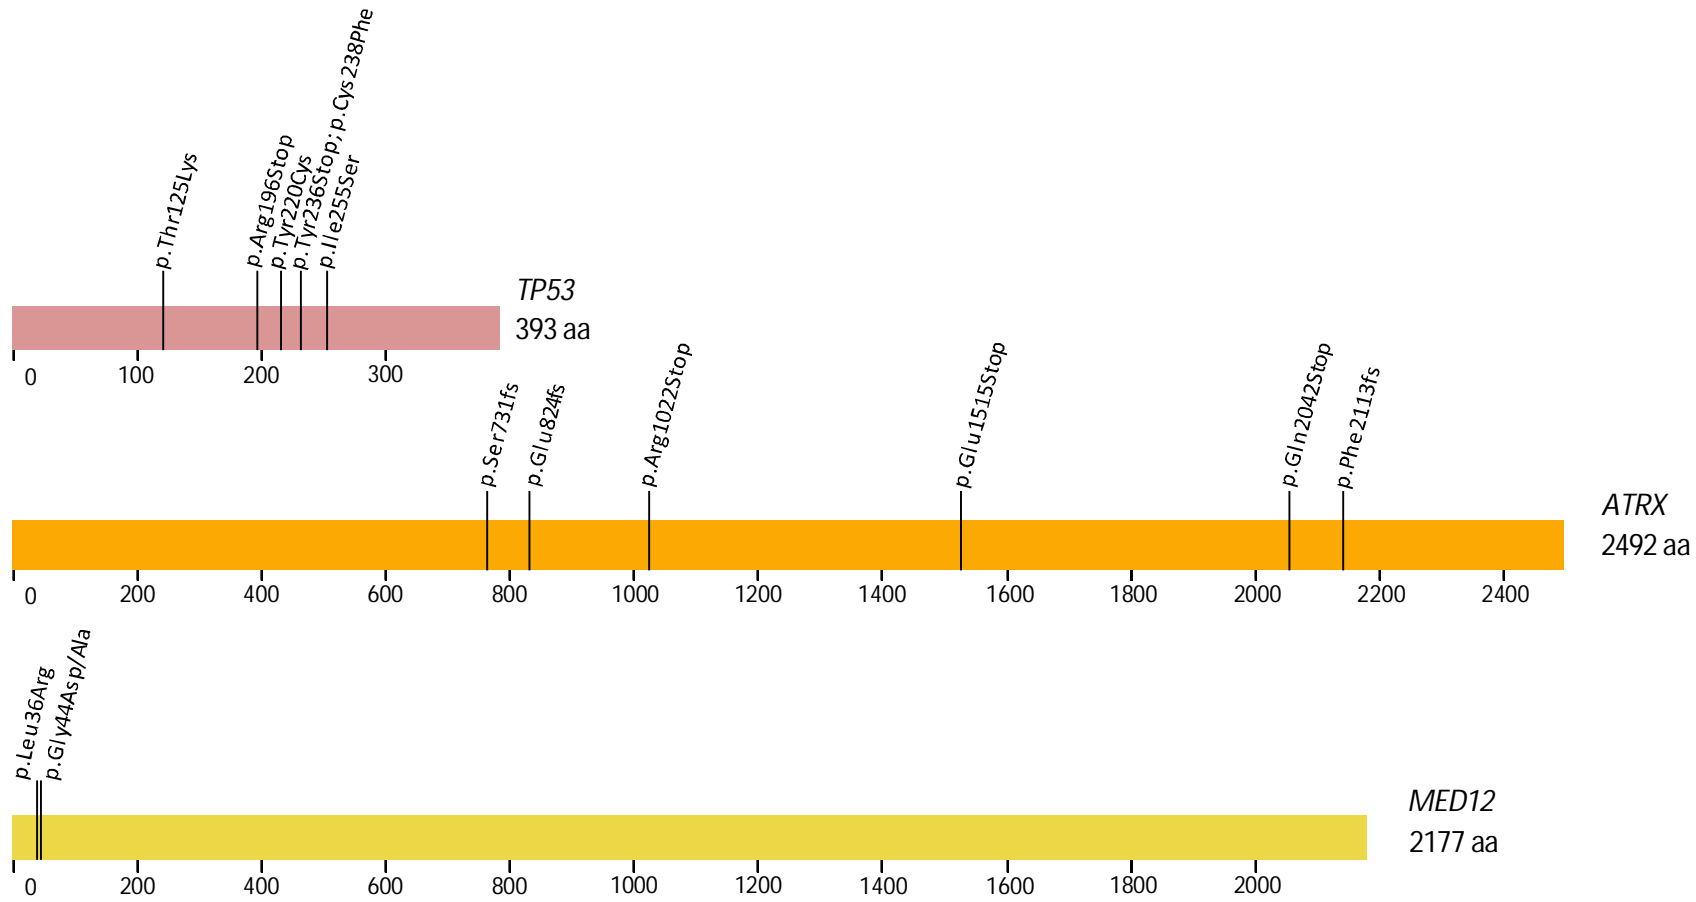

Supplement: pgen.1005850.s001.pdf [file pgen.1005850.s001.pdf]
