# Supplementary material for: Exome Sequencing of Uterine Leiomyosarcomas Identifies Frequent Mutations in TP53, ATRX, and MED12
Source: PubMed Central journal article supplement (PMC4758603; doi:10.1371/journal.pgen.1005850), 2016-02-18
Supplement: pgen.1005850.s003.pdf [file pgen.1005850.s003.pdf]

**Supplementary Table S1.** Landscape of somatic mutations in the 19 exome-sequenced ULMSs.

| Case ID | Average coverage | Covered $\geq$ 4 reads (%) | Total variant count <sup>a</sup> | SNVs (%) | Deletions (%) | Insertions (%) | Mutations per Mb <sup>b</sup> |
|---------|------------------|----------------------------|----------------------------------|----------|---------------|----------------|-------------------------------|
| LMS34   | 20.52            | 91                         | 293                              | 247 (84) | 38 (13)       | 8 (3)          | 5.25                          |
| LMS35   | 14.81            | 81                         | 259                              | 230 (89) | 24 (9)        | 5 (2)          | 5.17                          |
| LMS37   | 20.68            | 96                         | 317                              | 288 (91) | 19 (6)        | 10 (3)         | 5.43                          |
| LMS40   | 20.58            | 95                         | 374                              | 325 (87) | 37 (10)       | 12 (3)         | 6.4                           |
| LMS42   | 27.99            | 96                         | 408                              | 356 (87) | 39 (10)       | 13 (3)         | 6.99                          |
| LMS45   | 27.41            | 97                         | 278                              | 225 (81) | 41 (15)       | 12 (4)         | 4.66                          |
| LMS46   | 25.89            | 91                         | 349                              | 302 (87) | 35 (10)       | 12 (3)         | 6.63                          |
| LMS49   | 19.13            | 92                         | 568                              | 503 (89) | 52 (9)        | 13 (2)         | 10.53                         |
| LMS51   | 23.27            | 95                         | 779                              | 737 (95) | 35 (4)        | 7 (1)          | 13.64                         |
| LMS53   | 27.64            | 95                         | 384                              | 337 (88) | 37 (10)       | 10 (2)         | 6.72                          |
| LMS54   | 19.72            | 90                         | 369                              | 324 (88) | 31 (8)        | 14 (4)         | 7.37                          |
| LMS55   | 22.91            | 93                         | 456                              | 406 (89) | 37 (8)        | 13 (3)         | 7.98                          |
| LMS59   | 20.48            | 93                         | 277                              | 231 (83) | 28 (10)       | 18 (7)         | 4.9                           |
| LMS61   | 20.01            | 82                         | 441                              | 398 (90) | 40 (9)        | 3 (1)          | 9.28                          |
| LMS66   | 17.81            | 94                         | 301                              | 268 (89) | 24 (8)        | 9 (3)          | 5.21                          |
| LMS68   | 14.99            | 89                         | 240                              | 219 (91) | 17 (7)        | 4 (2)          | 4.92                          |
| LMS71   | 18.51            | 94                         | 338                              | 298 (88) | 27 (8)        | 13 (4)         | 5.85                          |
| LMS72   | 20.76            | 94                         | 266                              | 228 (86) | 32 (12)       | 6 (2)          | 4.66                          |
| LMS75   | 19.82            | 93                         | 403                              | 371 (92) | 24 (6)        | 8 (2)          | 7.47                          |

<sup>a</sup>Total variant count comprises all those variants which were located into positions with a minimum coverage of six reads and the mutated allele present in at least 20% of the reads, as well as remained after filtering the sequencing data against 93 Finnish individuals from the 1000 Genomes Project, 1941 Finnish individuals from The Sequencing Initiative Suomi (SISu), and 281 in-house control exomes or -genomes.

<sup>b</sup>Mutations per Mb was calculated by dividing the total number of somatic mutations by the total number of called nucleotide positions ( $\geq$ 6 reads).

SNV, single-nucleotide variation
