# Supplementary material for: Exome Sequencing of Uterine Leiomyosarcomas Identifies Frequent Mutations in TP53, ATRX, and MED12
Source: PubMed Central journal article supplement (PMC4758603; doi:10.1371/journal.pgen.1005850), 2016-02-18
Supplement: pgen.1005850.s006.pdf [file pgen.1005850.s006.pdf]

Supplementary Table S4. Primer sequences and PCR conditions for validation of the exon sequencing data.

| Gene                             | Exon                            | Alteration                                                           | Forward/Reverse          | Sequence 5'-3'              | Annealing temperature (°C) | Additional information          |
|----------------------------------|---------------------------------|----------------------------------------------------------------------|--------------------------|-----------------------------|----------------------------|---------------------------------|
| <i>TP53</i> (ENST00000269305)    | 4                               | c.374C>A, p.Thr125Lys                                                | Forward                  | CCCTTCCCAGAAAACCTACC        | 60                         |                                 |
|                                  |                                 |                                                                      | Reverse                  | GCCAAAGGGTGAAGAGGAAT        |                            |                                 |
|                                  | 6                               | c.586C>T, p.Arg196Stop; c.659A>G, p.Tyr220Cys                        | Forward                  | GAGAGACGACAGGGCTGGT         | 60                         |                                 |
|                                  |                                 |                                                                      | Reverse                  | CACTGACAACCACCTTAACC        |                            |                                 |
|                                  | 7                               | c.708C>G, p.Tyr236Stop; c.713G>T, p.Cys238Phe; c.764T>G, p.Ile255Ser | Forward                  | CCACAGGTCTCCCAAGG           | 60                         |                                 |
|                                  |                                 |                                                                      | Reverse                  | AGCAGGCCAGTGTGCG            |                            |                                 |
| <i>ATRX</i> (ENST00000373344)    | 9                               | c.2192delC, p.Ser731fs                                               | Forward                  | AAGCGTAATTCCTGACAGTGC       | 60                         |                                 |
|                                  |                                 |                                                                      | Reverse                  | TGAAGAAGAACTGTGACTCATCC     |                            |                                 |
|                                  | 9                               | c.2469insA, p.Glu824fs                                               | Forward                  | AAGGGCAAATCAGCTAAGAGC       | 60                         |                                 |
|                                  |                                 |                                                                      | Reverse                  | TTTTGCTGTGTTTCTCATCTTCA     |                            |                                 |
|                                  | 9                               | c.3064C>T, p.Arg1022Stop                                             | Forward                  | AAGCAGAGCAAAAAGGGAAC        | 60                         |                                 |
|                                  |                                 |                                                                      | Reverse                  | CTTTTCTCCATCAGTTGTTCCA      |                            |                                 |
|                                  | 15                              | c.4543G>T, p.Glu1515Stop                                             | Forward                  | TCCTGGAAAAGGCAGAAAGA        | 60                         |                                 |
|                                  |                                 |                                                                      | Reverse                  | GCAACAGAGCAAGACCCTGTA       |                            |                                 |
|                                  | 27                              | c.6124C>T, p.Gln2042Stop                                             | Forward                  | TTGTAGATCGATTTAGGAAGAAGTG   | 60                         |                                 |
|                                  |                                 |                                                                      | Reverse                  | GGGTTTATCTTTATCTTCTGTCTTC   |                            |                                 |
| 29                               | c.6338_6341delTTAT, p.Phe2113fs | Forward                                                              | AAGAAATGAATTCTGAACTCTTGA | 60                          |                            |                                 |
|                                  |                                 | Reverse                                                              | TCATAAGATGGATTCCAAGAAGC  |                             |                            |                                 |
| <i>FSIP2</i> (ENST00000343098)   | 15                              | c.1742A>T, p.Gln581Leu                                               | Forward                  | TCAATAATTAGAAATTTGGGAAAAG   | 60                         | 1.5 mM MgCl <sub>2</sub> /25 µl |
|                                  |                                 |                                                                      | Reverse                  | CATCAGAAAGTATGACTAATATGTTGC |                            |                                 |
|                                  | 16                              | c.5279A>G, p.Asn1760Ser                                              | Forward                  | TGCATGCCAAAGAAGGTATCAA      | 60                         | 1.5 mM MgCl <sub>2</sub> /25 µl |
|                                  |                                 |                                                                      | Reverse                  | ATGCCTCCCCCTTCAGATT         |                            |                                 |
|                                  | 16                              | c.10399G>A, p.Glu3467Lys                                             | Forward                  | CAGCTGTGGCTTCCAAGTC         | 60                         |                                 |
|                                  |                                 |                                                                      | Reverse                  | GCTGGCTTCAAGTTTTTCAT        |                            |                                 |
|                                  | 17                              | c.16664G>A, p.Gly5556Asp                                             | Forward                  | GCAGATGTGCAAAAGAGAACC       | 60                         | 1.5 mM MgCl <sub>2</sub> /25 µl |
|                                  |                                 |                                                                      | Reverse                  | TTTTTCACTGATGTGCTTGG        |                            |                                 |
| <i>ABCA13</i> (ENST00000435803)  | 14                              | c.1781G>C, p.Arg594Pro                                               | Forward                  | GAATATTTGGACTGGCAGGAA       | 60                         | 1.5 mM MgCl <sub>2</sub> /25 µl |
|                                  |                                 |                                                                      | Reverse                  | CATTCTGATGTCCCAATTGTTT      |                            |                                 |
|                                  | 17                              | c.2937G>C, p.Gln979His                                               | Forward                  | CCTAAATGTCTCCAGACAAG        | 60                         |                                 |
|                                  |                                 |                                                                      | Reverse                  | CCCCAARAACCTCTGCTGT         |                            |                                 |
|                                  | 37                              | c.11654T>C, p.Ile3885Thr                                             | Forward                  | AGGGAAGGAGAGCTTGAAGG        | 60                         |                                 |
|                                  |                                 |                                                                      | Reverse                  | TTTTAAGAATCAAATGCCCAGT      |                            |                                 |
| <i>ANKRD26</i> (ENST00000376087) | 13                              | c.1461G>C, p.Met487Ile                                               | Forward                  | CTTCTGCATGAGTGGATCA         | 60                         |                                 |
|                                  |                                 |                                                                      | Reverse                  | TGTTCTGAATTGATCAGCTTGG      |                            |                                 |
|                                  | 24                              | c.3016G>A, p.Val1006Ile                                              | Forward                  | TGGACGGCTTAGTGTCTGA         | 60                         |                                 |
|                                  |                                 |                                                                      | Reverse                  | GCTCTCTGGAARCAAGTTCTAGT     |                            |                                 |
| <i>DAXX</i> (ENST00000374542)    | 7                               | c.1948G>T, p.Glu650Stop                                              | Forward                  | CCTCCAGCCTCAGTCTCC          | 60                         |                                 |
|                                  |                                 |                                                                      | Reverse                  | GGGAGAGTCCACCCTCGT          |                            |                                 |
